# Supplementary material
Source: publisher figshare collection journal article supplement (https://wiley.figshare.com/articles/dataset/_/3567804)
Supplement: Supplementary file 1 [file 1 › appendix-A.htm]

Ecological Archives M081-019-A1


### *Ecological Archives* M081-019-A1

### Nathan L. Stephenson, Phillip J. van Mantgem, Andrew G. Bunn, Howard Bruner, Mark E. Harmon, Kari B. O’Connell, Dean L. Urban, and Jerry F. Franklin. 2011. Causes and implications of the correlation between forest productivity and tree mortality rates. *Ecological Monographs* 81:527–555.

Appendix A. Determining relative contributions of proximate causes to differences in mortality rates.

> View / download PDF.

---


[Back to M081-019]
